# Supplementary material
Source: bioRxiv or medRxiv preprint supplement (https://www.biorxiv.org/highwire/filestream/128586/field_highwire_adjunct_files/0/422675-1.pdf)

Figure 1.

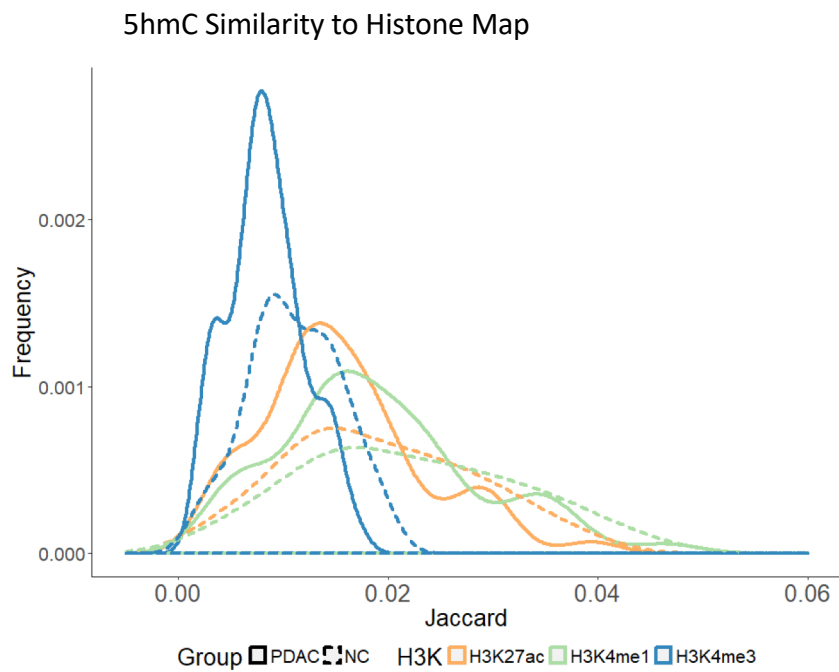

Figure 2

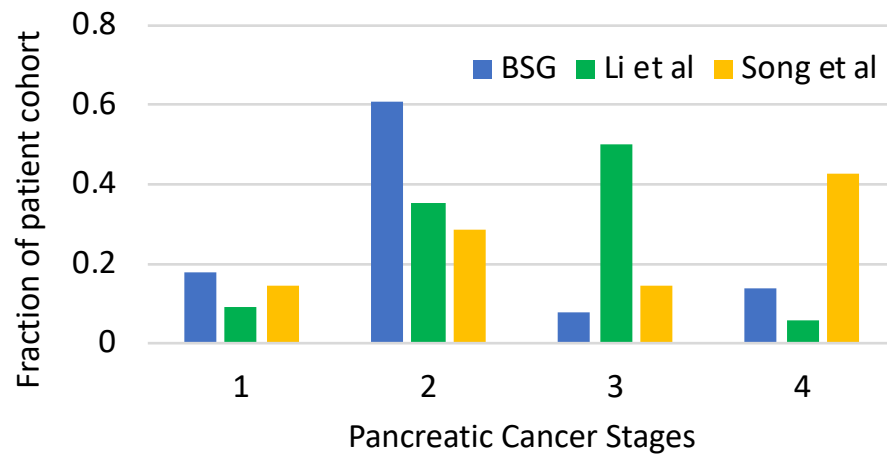

Supplement: Supplementary file [file 422675-1.pdf]
